# Supplementary material for: SKA2 regulated hyperactive secretory autophagy drives neuroinflammation-induced neurodegeneration
Source: PubMed Central journal article supplement (PMC10963788; doi:10.1038/s41467-024-46953-x), 2024-03-25
Supplement: 41467_2024_46953_MOESM3_ESM.pdf [file 41467_2024_46953_MOESM3_ESM.pdf]

## **Description of Additional Supplementary Files**

**File Name: Supplementary Data 1**

**Description:** Differentially expressed genes 2 weeks after viral-mediated knockdown of Ska2.

**File Name: Supplementary Data 2**

**Description:** Differentially expressed genes 4 weeks after viral-mediated knockdown of Ska2.

**File Name: Supplementary Data 3**

**Description:** Gene ontology enrichment analysis 2 weeks after viral-mediated knockdown of Ska2.

**File Name: Supplementary Data 4**

**Description:** Gene ontology enrichment analysis 4 weeks after viral-mediated knockdown of Ska2.

**File Name: Supplementary Data 5**

**Description:** Kyoto Encyclopedia of Genes and Genomes pathway enrichment analysis 2 weeks after viral-mediated knockdown of Ska2.

**File Name: Supplementary Data 6**

**Description:** Phenome-Wide Association Studies (PheWAS) table of the FKBP5 locus.

**File Name: Supplementary Data 7**

**Description:** Phenome-Wide Association Studies (PheWAS) table of the SKA2 locus.

**File Name: Supplementary Data 8**

**Description:** Details of human postmortem subjects (Immunoprecipitation).

**File Name: Supplementary Data 9**

**Description:** Details of human postmortem subjects (Immunohistochemistry).

**File Name: Supplementary Data 10**

**Description:** Details of human postmortem subjects (Alzheimer's disease discovery cohort (HIP)).

**File Name: Supplementary Data 11**

**Description:** Details of human postmortem subjects (Alzheimer's disease replication cohort (PFC)).
